# Supplementary material for: Metal complexes with bis(2-pyridyl)diselenoethers: structural chemistry and catalysis
Source: Royal Society of Chemistry journal article supplement (doi:10.1039/c5nj01400j), 2015-01-01
Supplement: c5nj01400j1.pdf [file c5nj01400j1.pdf]

**New Journal of Chemistry - Electronic Supplementary  
Information**

**Metal complexes with bis(2-pyridyl)diselenoethers: Structural  
chemistry and catalysis**

**Roberta Cargnelutti,<sup>a</sup> Felipe Dornelles da Silva,<sup>a</sup> Ulrich Abram<sup>\*b</sup> and Ernesto  
Schulz Lang,<sup>\*a</sup>**

**Table S1.** Crystallographic data and refinement parameters for **1-6**.

| Crystal Data                                   | <b>1</b>                                                                         | <b>2</b>                                                                                      | <b>3</b>                                                                         | <b>4</b>                                                                         | <b>5</b>                                                                         | <b>6</b>                                                                         |
|------------------------------------------------|----------------------------------------------------------------------------------|-----------------------------------------------------------------------------------------------|----------------------------------------------------------------------------------|----------------------------------------------------------------------------------|----------------------------------------------------------------------------------|----------------------------------------------------------------------------------|
| Formula                                        | C <sub>11</sub> H <sub>10</sub> Cl <sub>2</sub> CuN <sub>2</sub> Se <sub>2</sub> | C <sub>22</sub> H <sub>20</sub> Cu <sub>4</sub> I <sub>4</sub> N <sub>4</sub> Se <sub>4</sub> | C <sub>26</sub> H <sub>28</sub> Cl <sub>2</sub> CuN <sub>4</sub> Se <sub>4</sub> | C <sub>13</sub> H <sub>14</sub> Cl <sub>2</sub> CoN <sub>2</sub> Se <sub>2</sub> | C <sub>13</sub> H <sub>14</sub> Ag N <sub>3</sub> O <sub>3</sub> Se <sub>2</sub> | C <sub>14</sub> H <sub>16</sub> Cl <sub>2</sub> CuN <sub>2</sub> Se <sub>2</sub> |
| Fw (g mol <sup>-1</sup> )                      | 462.57                                                                           | 1418.02                                                                                       | 846.83                                                                           | 846.83                                                                           | 526.06                                                                           | 504.65                                                                           |
| T (K)                                          | 173(2)                                                                           | 173(2)                                                                                        | 200(2)                                                                           | 200(2)                                                                           | 200(2)                                                                           | 173(2)                                                                           |
| Crystal system                                 | Orthorhombic                                                                     | Triclinic                                                                                     | Triclinic                                                                        | Monoclinic                                                                       | Monoclinic                                                                       | Orthorhombic                                                                     |
| Space group                                    | <i>Pbca</i>                                                                      | <i>P1</i>                                                                                     | <i>P1</i>                                                                        | <i>P2<sub>1</sub>/n</i>                                                          | <i>P2/c</i>                                                                      | <i>Pbca</i>                                                                      |
| <i>a</i> /Å                                    | 11.9328(10)                                                                      | 9.0860(2)                                                                                     | 8.2538(10)                                                                       | 20.476(2)                                                                        | 9.7910(10)                                                                       | 10.2403(3)                                                                       |
| <i>b</i> /Å                                    | 12.2111(10)                                                                      | 9.1684(2)                                                                                     | 8.7192(10)                                                                       | 8.5749(6)                                                                        | 4.4420(10)                                                                       | 11.4552(3)                                                                       |
| <i>c</i> /Å                                    | 18.6534(16)                                                                      | 10.5159(3)                                                                                    | 11.6817(12)                                                                      | 21.202(2)                                                                        | 20.883(3)                                                                        | 14.8043(4)                                                                       |
| $\alpha$ /°                                    | 90                                                                               | 70.960(10)                                                                                    | 87.058(9)                                                                        | 90                                                                               | 90                                                                               | 90                                                                               |
| $\beta$ /°                                     | 90                                                                               | 88.276(10)                                                                                    | 81.017(9)                                                                        | 115.735(8)                                                                       | 90.960                                                                           | 90                                                                               |
| $\gamma$ /°                                    | 90                                                                               | 77.370(10)                                                                                    | 62.798(8)                                                                        | 90                                                                               | 90                                                                               | 90                                                                               |
| <i>V</i> /Å <sup>3</sup>                       | 2718.0(4)                                                                        | 807.25(3)                                                                                     | 738.35(14)                                                                       | 3353.4(6)                                                                        | 908.1(3)                                                                         | 1736.61(8)                                                                       |
| <i>Z</i>                                       | 8                                                                                | 1                                                                                             | 1                                                                                | 8                                                                                | 2                                                                                | 4                                                                                |
| <i>D</i> <sub>calc</sub> (g cm <sup>-3</sup> ) | 2.261                                                                            | 2.917                                                                                         | 1.905                                                                            | 1.925                                                                            | 1.924                                                                            | 1.930                                                                            |
| $\mu$ (Mo K $\alpha$ ) (mm <sup>-1</sup> )     | 7.337                                                                            | 10.954                                                                                        | 5.874                                                                            | 5.674                                                                            | 5.130                                                                            | 5.751                                                                            |
| $\lambda$ /Å                                   | 0.71073                                                                          | 0.71073                                                                                       | 0.71073                                                                          | 0.71073                                                                          | 0.71073                                                                          | 0.71073                                                                          |
| <i>F</i> (000)                                 | 1768                                                                             | 644                                                                                           | 411                                                                              | 1880                                                                             | 504                                                                              | 980                                                                              |
| Collected reflns.                              | 56282                                                                            | 11123                                                                                         | 8469                                                                             | 18299                                                                            | 6289                                                                             | 27397                                                                            |
| Unique reflns.                                 | 6021                                                                             | 7012                                                                                          | 3933                                                                             | 6569                                                                             | 2433                                                                             | 3280                                                                             |
| GOF ( <i>F</i> <sup>2</sup> )                  | 0.852                                                                            | 1.053                                                                                         | 0.781                                                                            | 0.717                                                                            | 0.947                                                                            | 1.014                                                                            |
| <i>R</i> <sub>1</sub> <sup>a</sup>             | 0.0203                                                                           | 0.0193                                                                                        | 0.0357                                                                           | 0.0479                                                                           | 0.0572                                                                           | 0.0217                                                                           |
| <i>wR</i> <sub>2</sub> <sup>b</sup>            | 0.0924                                                                           | 0.0475                                                                                        | 0.1060                                                                           | 0.0512                                                                           | 0.1522                                                                           | 0.0515                                                                           |

$$^a R_1 = \frac{\sum ||F_o| - |F_c||}{\sum |F_o|}$$

$$^b wR_2 = \left\{ \frac{\sum w(F_o^2 - F_c^2)^2}{\sum w(F_o^2)^2} \right\}^{1/2}$$

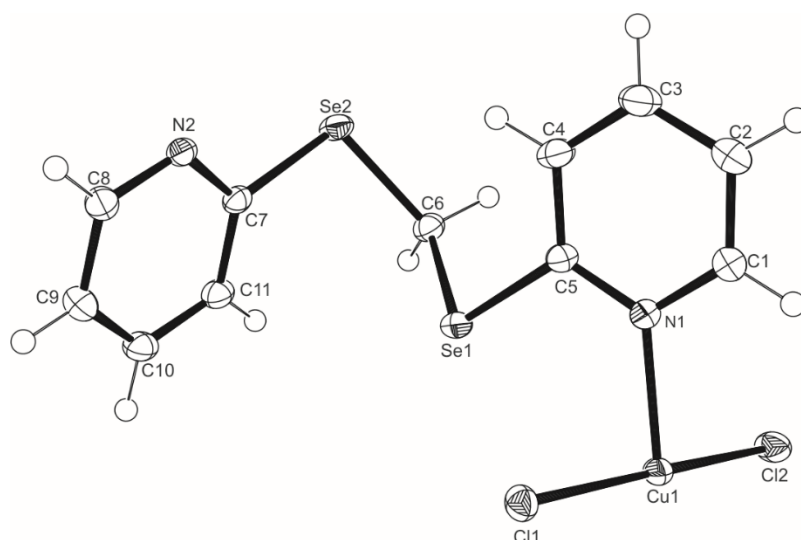

**Figure S1.** ORTEP<sup>1</sup> view of the asymmetric unit of the compound [CuCl<sub>2</sub>(L1)]<sub>n</sub> (**1**) with the thermal ellipsoids at 50% probability. Selected bond lengths [Å] and angles [°]: Cu(1)–N(1) = 2.0644(15), Cu(1)–Cl(2) = 2.2493(5), Cu(1)–Cl(1) = 2.2757(5), Se(1)–C(5) = 1.9080(17), Se(1)–C(6) = 1.9513(18), Se(2)–C(7) = 1.8997(17), Se(2)–C(6) = 1.9567(17), N(1)–Cu(1)–Cl(1) = 90.67(4), Cl(1)–Cu(1)–Cl(2) = 175.91 (2).

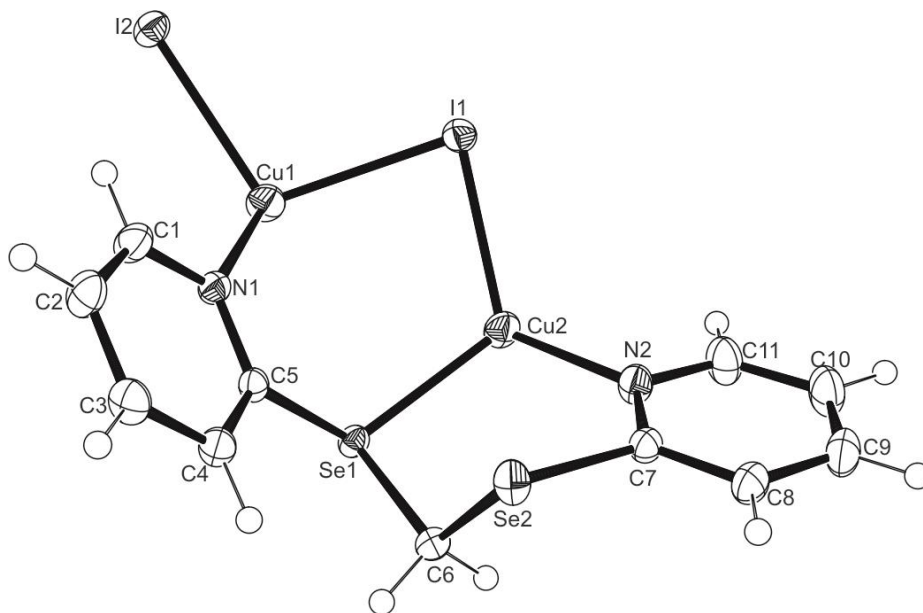

**Figure S2.** ORTEP<sup>1</sup> view of the asymmetric unit of the compound [Cu<sub>4</sub>I<sub>4</sub>(L1)<sub>2</sub>] (**2**) with the thermal ellipsoids at 50% probability. Selected bond distances [Å] and angles [°]: I(1)–Cu(2) = 2.5703(3), I(1)–Cu(1) = 2.6897(3), Cu(2)–N(2) = 2.0570(16), Cu(2)–Se(1) = 2.4240(3), I(2)–Cu(1) = 2.6890(3), Se(1)–C(5) = 1.9197(15), Cu(1)–N(1) = 2.0661(14), Cu(2)–I(1)–Cu(1) = 83.536(8), N(2)–Cu(2)–Se(1) = 110.29(4), N(2)–Cu(2)–I(1) = 118.35(5), Se(1)–Cu(2)–I(1) = 113.437(10), I(2)–Cu(1)–I(1) = 103.863(9).

<sup>1</sup> Farrugia, L.J. "ORTEP 3 Program for Ellipsoid of Crystal Structures" *J. Appl. Cryst.* **1997**, 30.

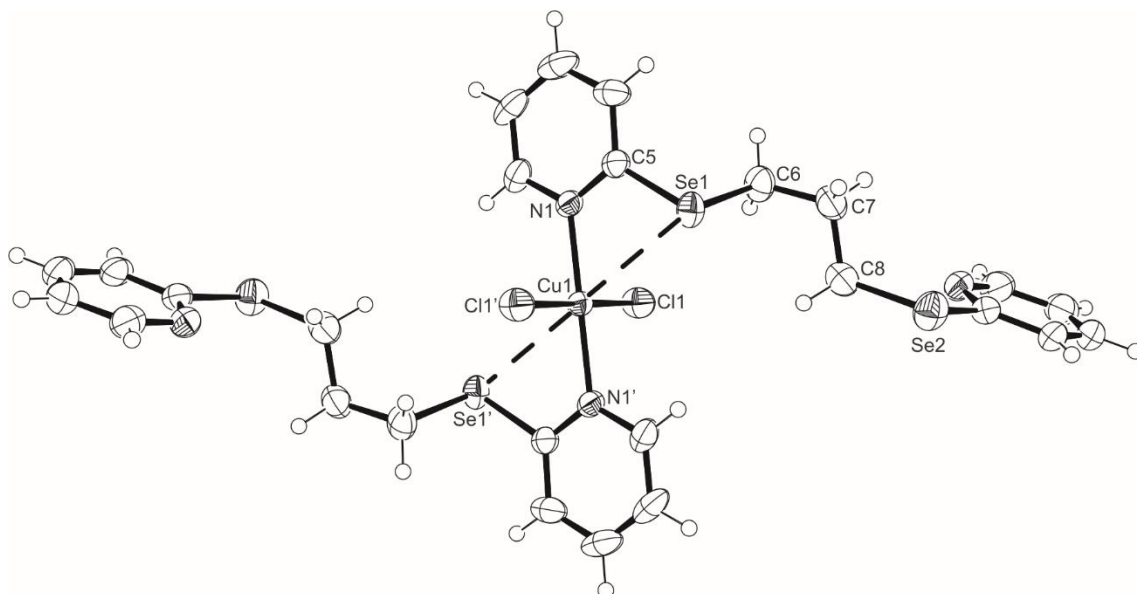

**Figure S3.** ORTEP<sup>1</sup> view of the asymmetric unit of the compound [CuCl<sub>2</sub>(L<sub>2</sub>)<sub>2</sub>] (**3**) with the thermal ellipsoids at 50% probability. Selected bond distances [Å] and angles [°]: Cu(1)–N(1) = 1.993(3), Cu(1)–Cl(1) = 2.2794(8), Cu(1)–Se(1) = 3.1289(3), N(1)–Cu(1)–Se(1) = 60.616(5), Cl(1)–Cu(1)–Se(1) = 91.491(6), N(1)–Cu(1)–Cl(1) = 91.18(8). Symmetry transformations used to generate equivalent atoms: (') 1–x, 1–y, 1–z.

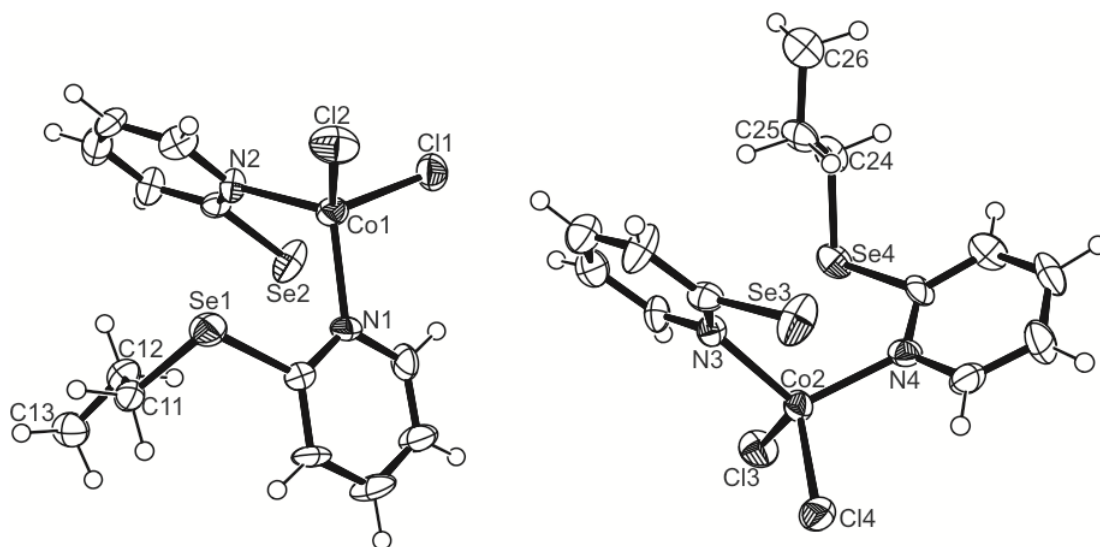

**Figure S4.** ORTEP<sup>1</sup> view of the asymmetric unit of the compound [CoCl<sub>2</sub>(L<sub>2</sub>)]<sub>n</sub> (**4**) with the thermal ellipsoids at 50% probability. Selected bond lengths [Å] and angles [°]: Co(1)–N(1) = 2.052(6), Co(1)–N(2) = 2.053(6), Co(1)–Cl(1) = 2.247(2), Co(1)–Cl(2) = 2.252(2), N(1)–Co(1)–N(2) = 111.3(3), N(1)–Co(1)–Cl(1) = 105.44(18), N(2)–Co(1)–Cl(1) = 110.99(18), N(1)–Co(1)–Cl(2) = 113.78(18), N(2)–Co(1)–Cl(2) = 108.39(17), Cl(1)–Co(1)–Cl(2) = 106.87(10).

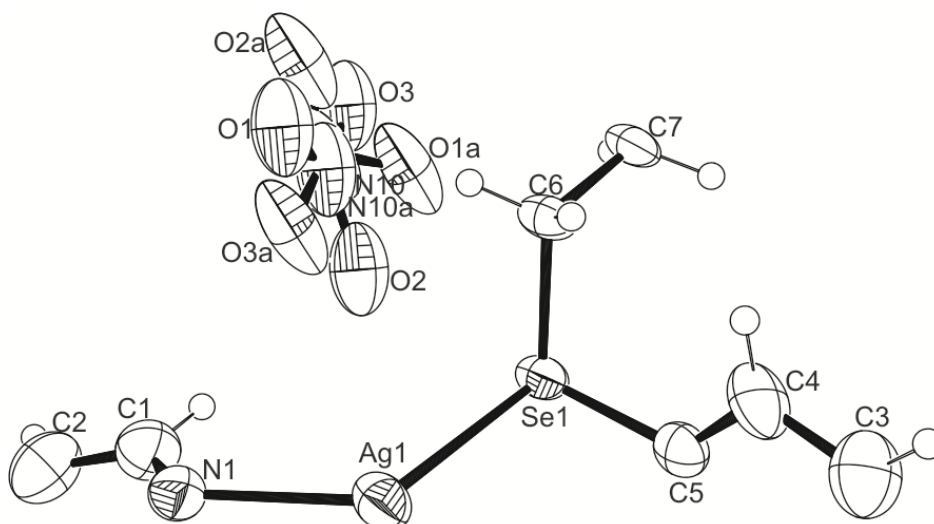

**Figure S5.** ORTEP<sup>1</sup> view of the asymmetric unit of the compound [Ag(L2)(NO<sub>3</sub>)]<sub>n</sub> (**5**) with the thermal ellipsoids at 50% probability. The NO<sub>3</sub><sup>-</sup> ion exhibit positional disorder. Selected bond distances [Å] and angles [°]: Se(1)–Ag(1) = 2.7310(6), Ag(1)–N(1) = 2.321(4), Se(1)–C(5) = 1.921(4), Se(1)–C(6) = 1.973(4), N(1)–Ag(1)–Se(1) = 123.37(9), C(6)–Se(1)–Ag(1) = 104.02(11), C(5)–Se(1)–Ag(1) = 93.98(12).

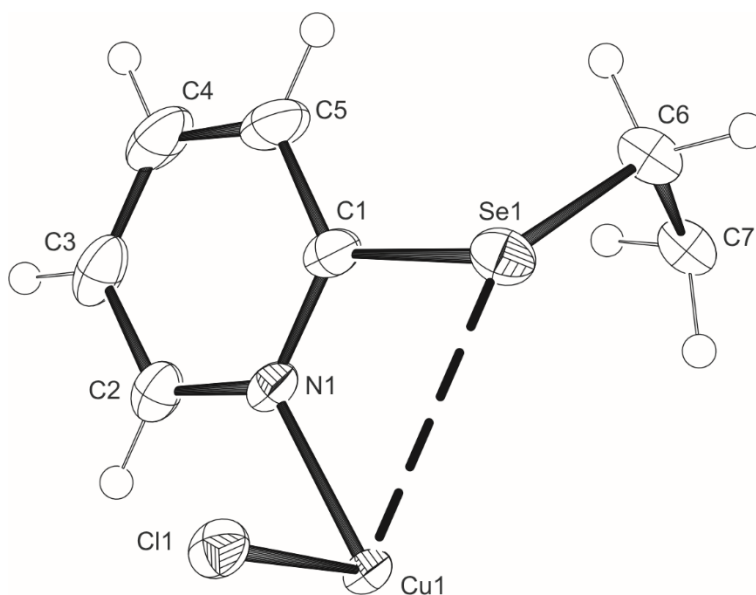

**Figure S6.** ORTEP<sup>1</sup> view of the asymmetric unit of the compound [CuCl<sub>2</sub>(L3)]<sub>n</sub> (**6**) with the thermal ellipsoids at 50% probability. Selected bond lengths [Å] and angles [°]: Cu(1)–N(1) = 1.9762(11), Cu(1)–Cl(1) = 2.2861(3), Cu(1)–Se(1) = 3.0628(1); N(1)–Cu(1)–Se(1) = 82.118(1), Cl(1)–Cu(1)–Se(1) = 117.576(1), N(1)–Cu(1)–Cl(1) = 88.94(3).

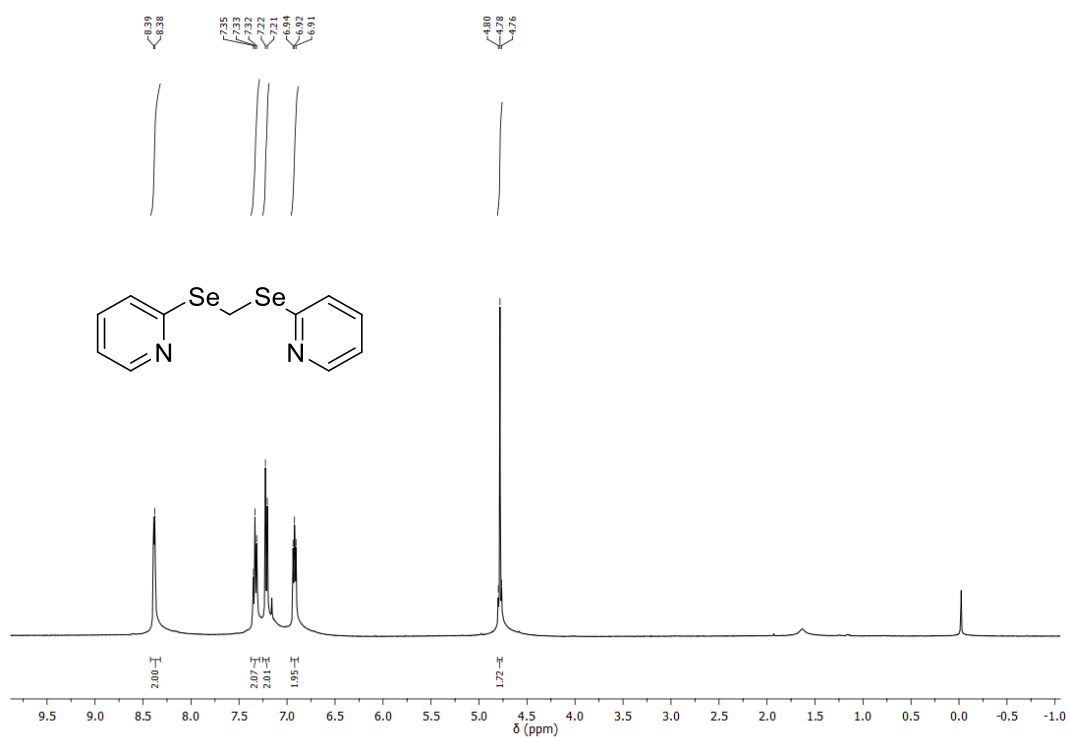

**Figure S7.**  $^1\text{H-NMR}$  spectrum of Ligand (L1) in  $\text{CDCl}_3$ .

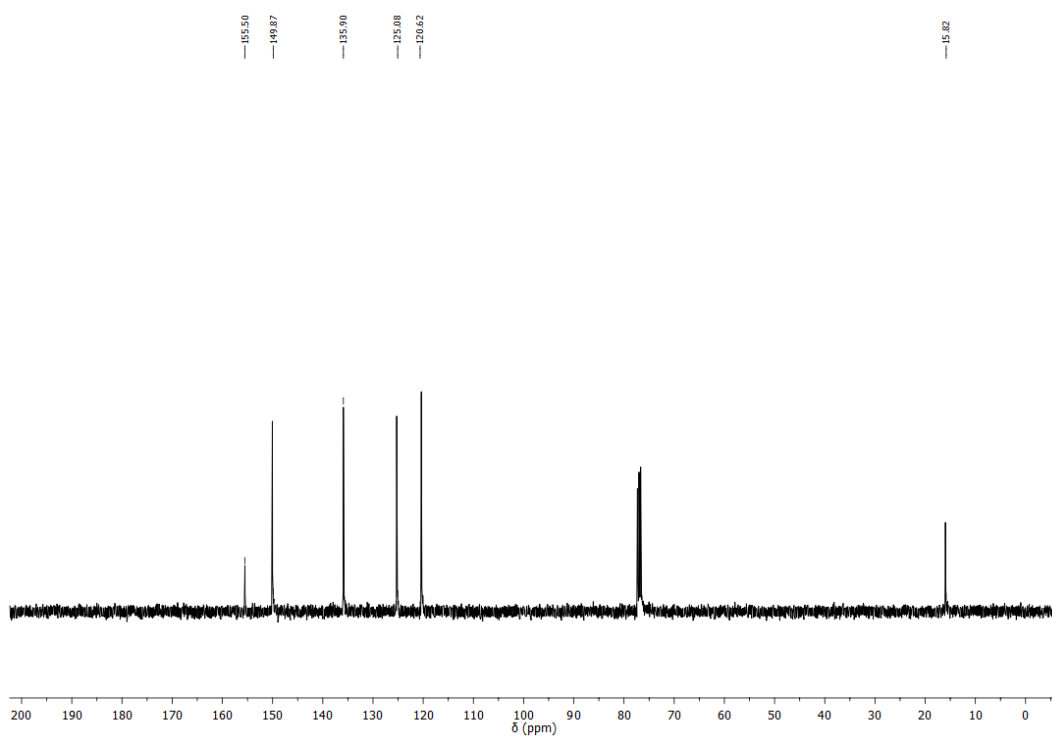

**Figure S8.**  $^{13}\text{C-NMR}$  spectrum of Ligand (L1) in  $\text{CDCl}_3$ .

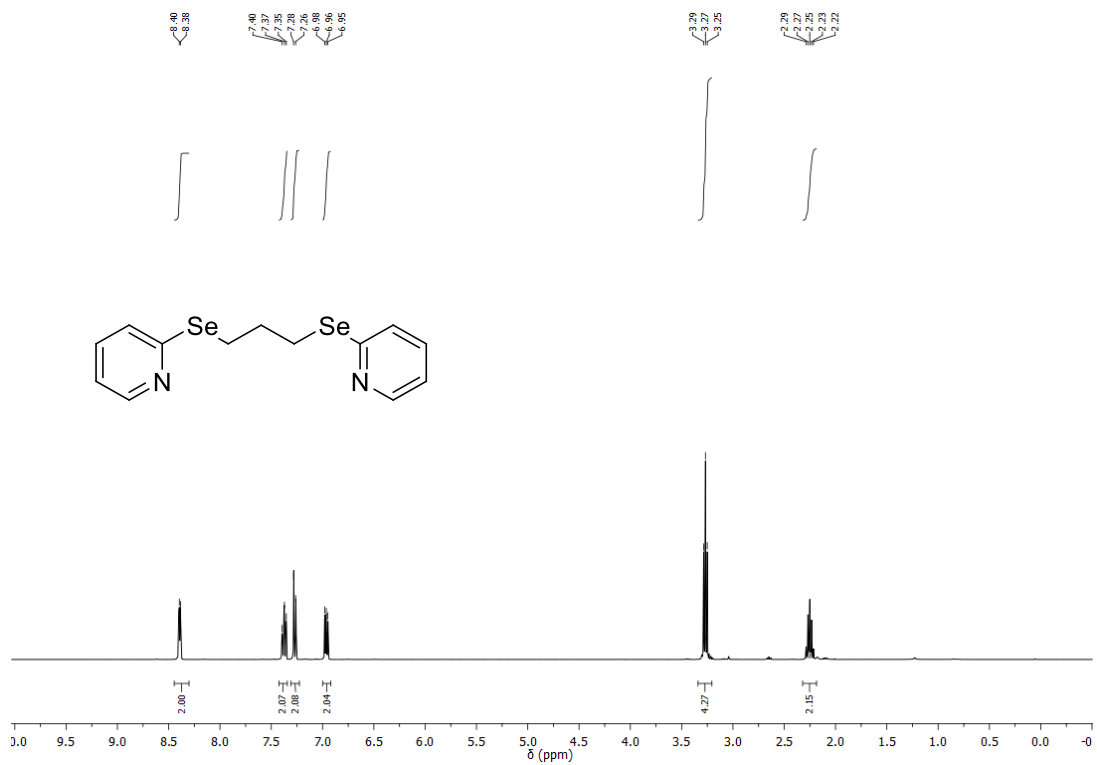

**Figure S9.** <sup>1</sup>H-NMR spectrum of Ligand (L2) in CDCl<sub>3</sub>.

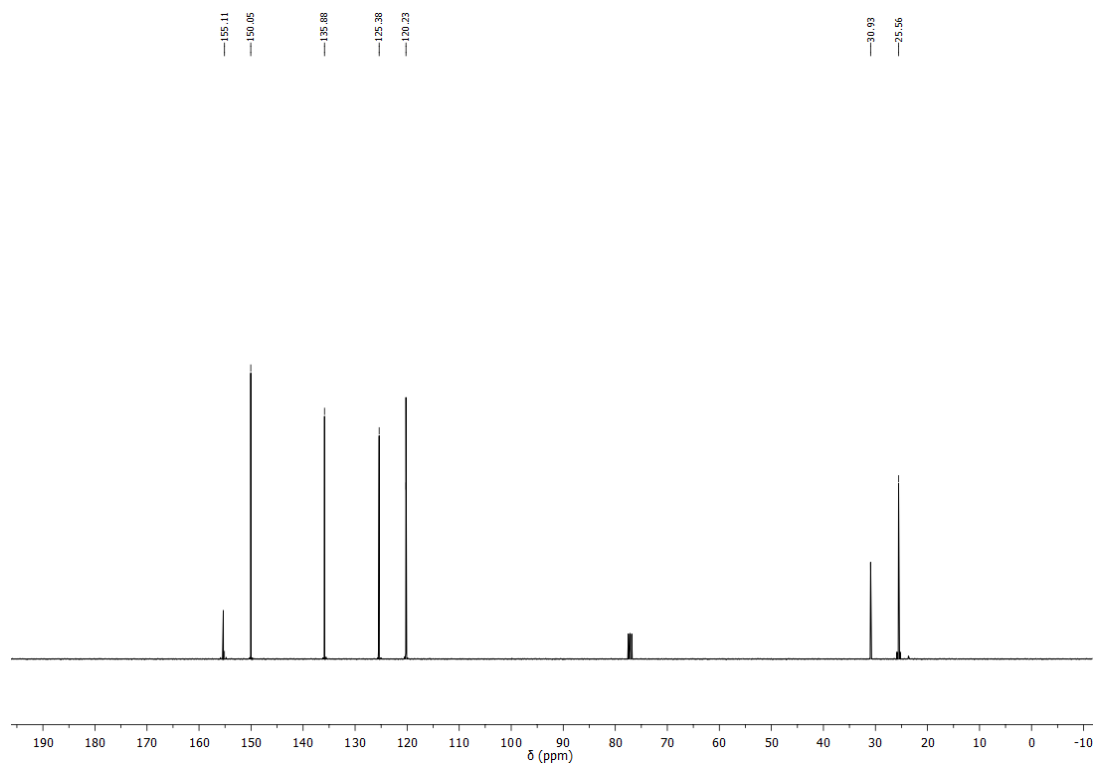

**Figure S10.** <sup>13</sup>C-NMR spectrum of Ligand (L2) in CDCl<sub>3</sub>.

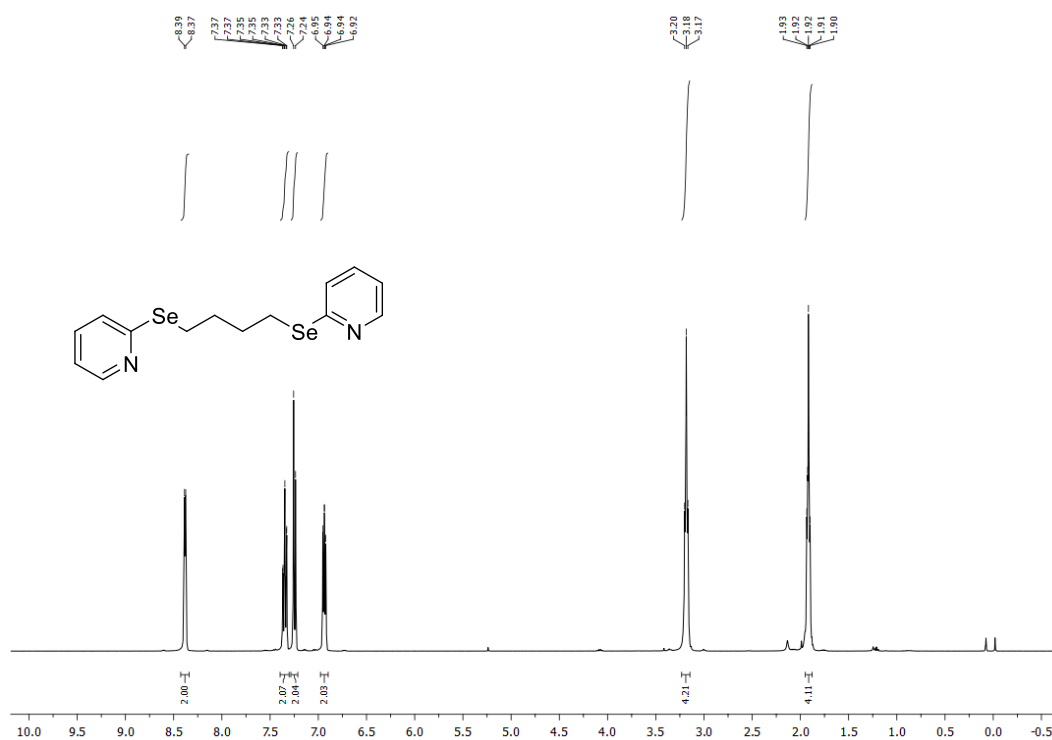

**Figure S11.** <sup>1</sup>H-NMR spectrum of Ligand (L3) in CDCl<sub>3</sub>.

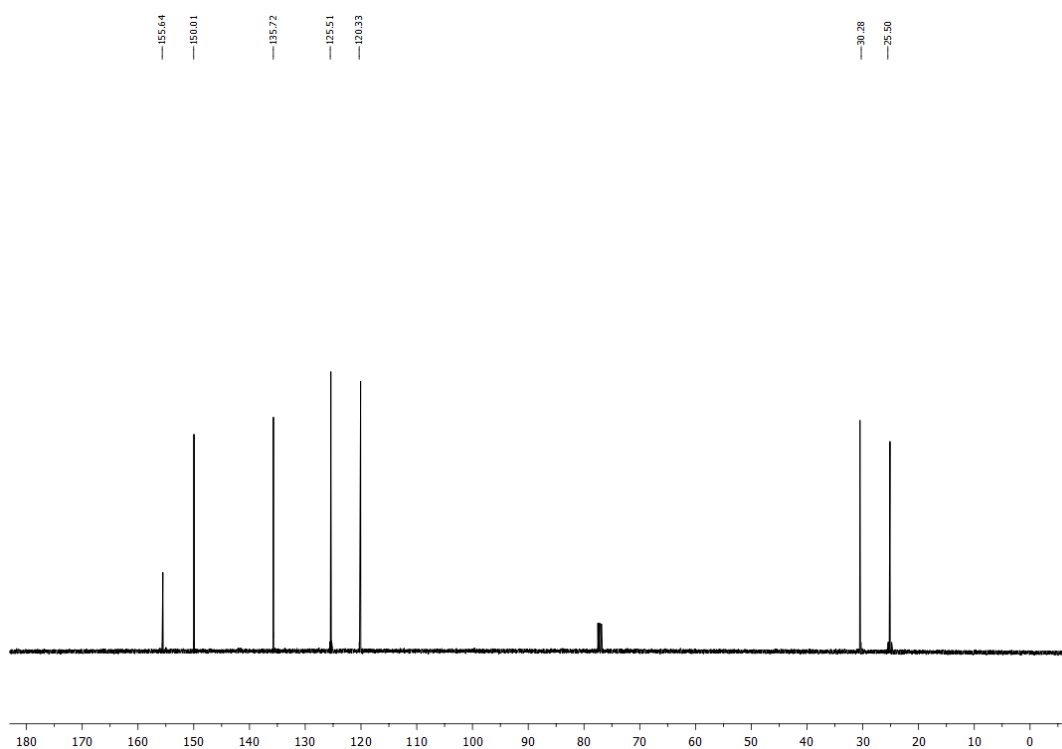

**Figure S12.** <sup>13</sup>C-NMR spectrum of Ligand (L3) in CDCl<sub>3</sub>.



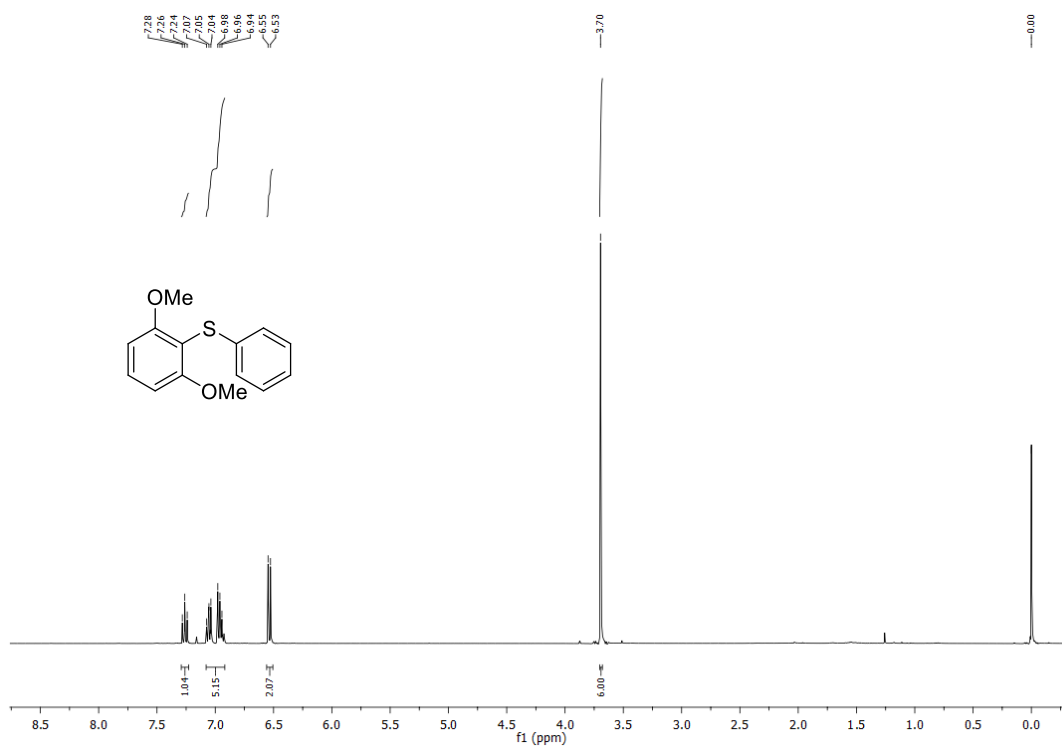

**Figure S13.**  $^1\text{H-NMR}$  spectrum of **9a** in  $\text{CDCl}_3$ .

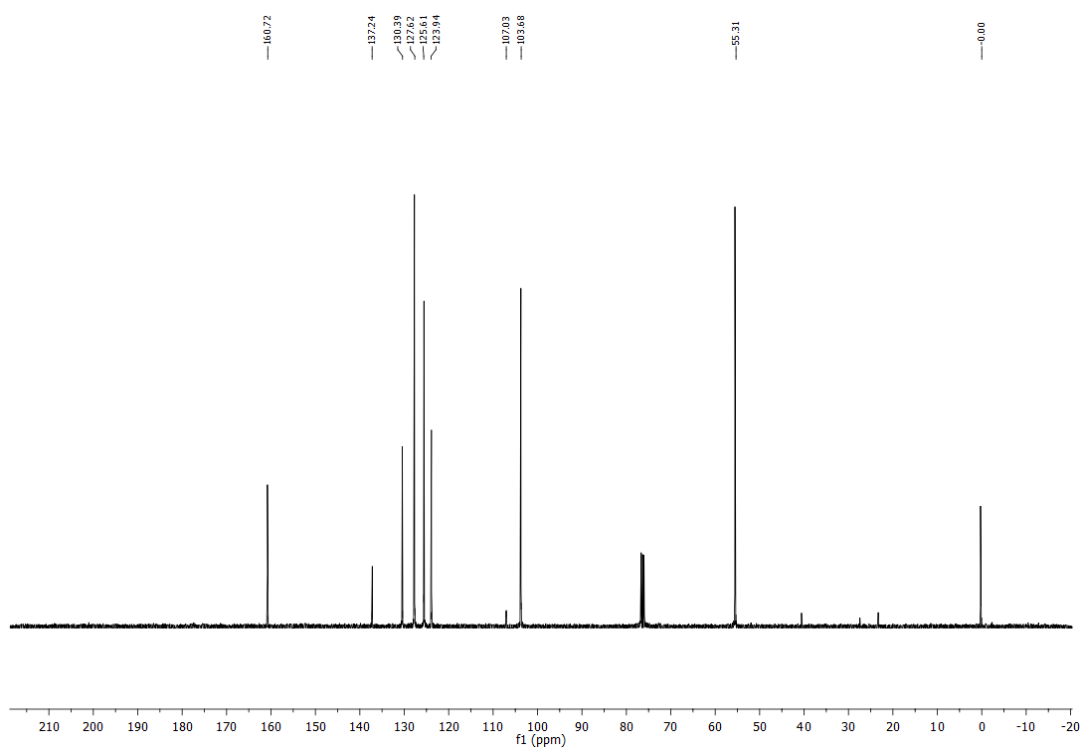

**Figure S14.**  $^{13}\text{C-NMR}$  spectrum of **9a** in  $\text{CDCl}_3$ .

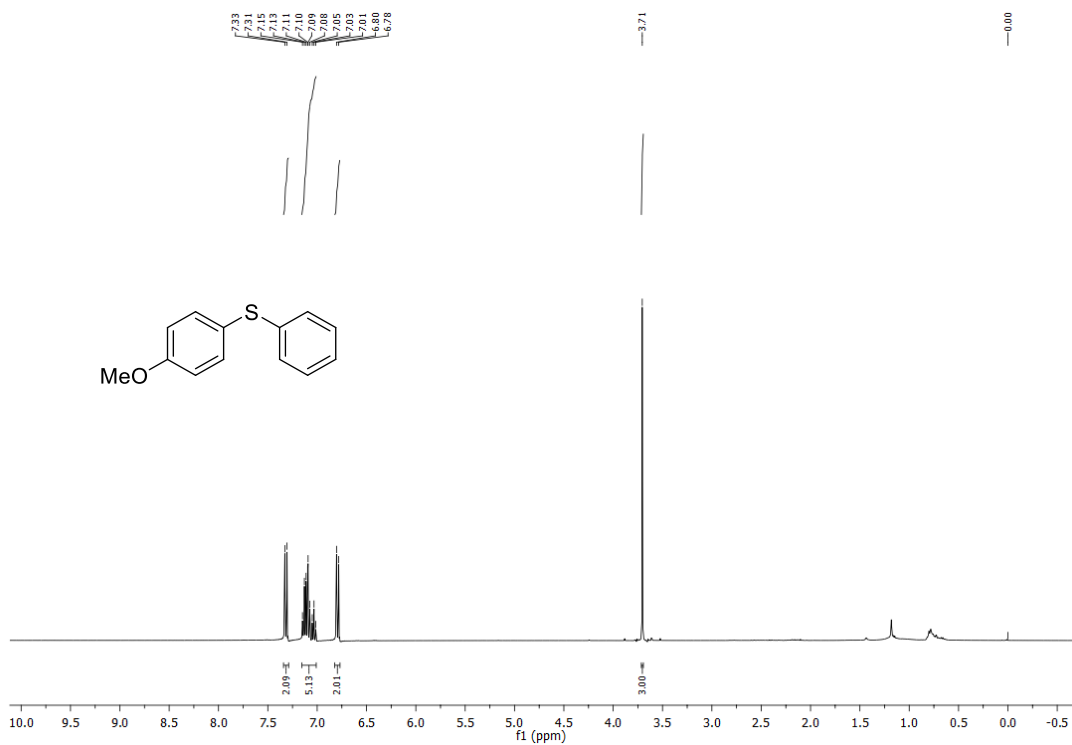

**Figure S15.** <sup>1</sup>H-NMR spectrum of **9b** in CDCl<sub>3</sub>.

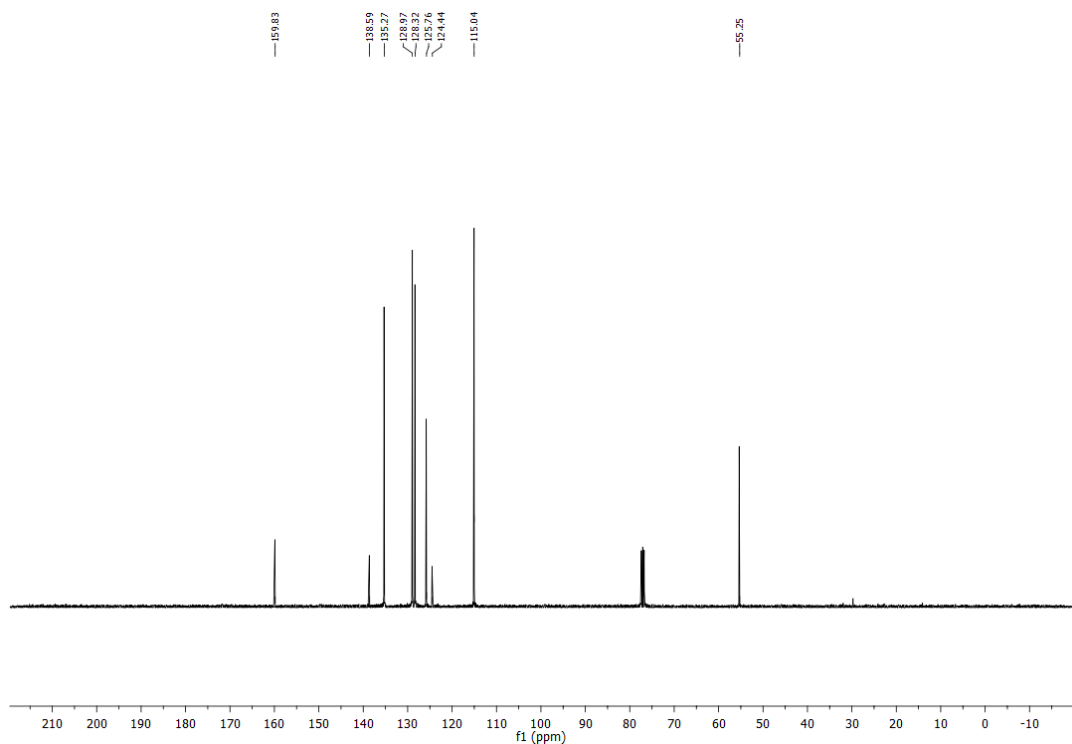

**Figure S16.** <sup>13</sup>C-NMR spectrum of **9b** in CDCl<sub>3</sub>.

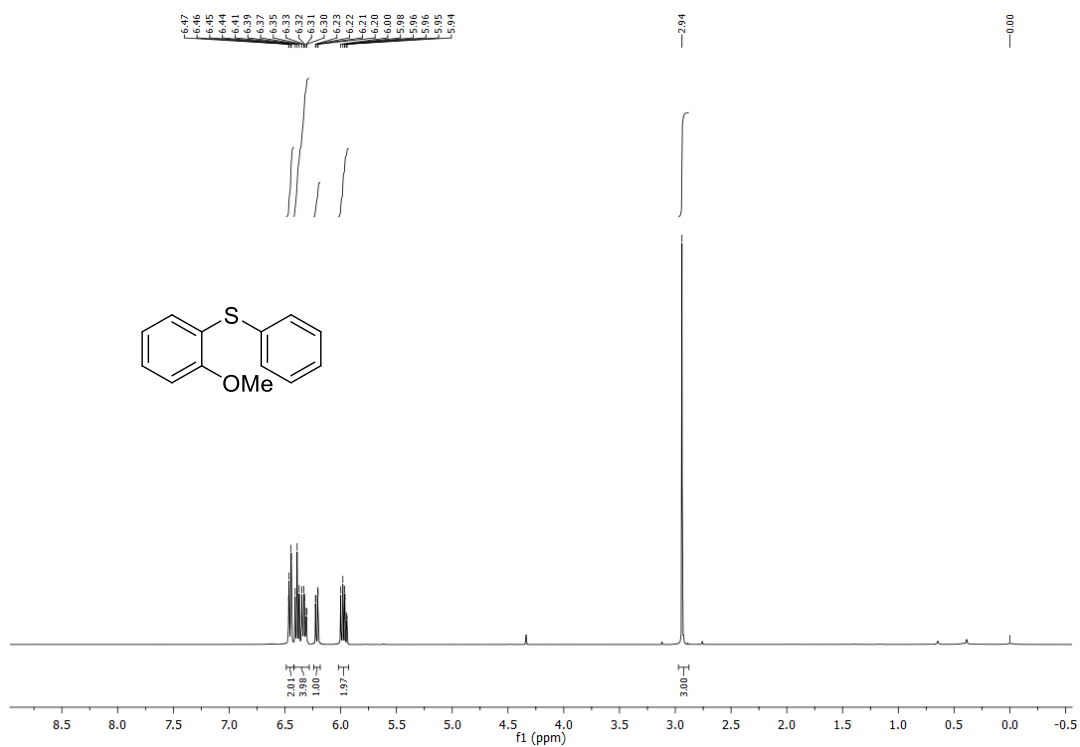

Figure S17. <sup>1</sup>H-NMR spectrum of 9c in CDCl<sub>3</sub>.

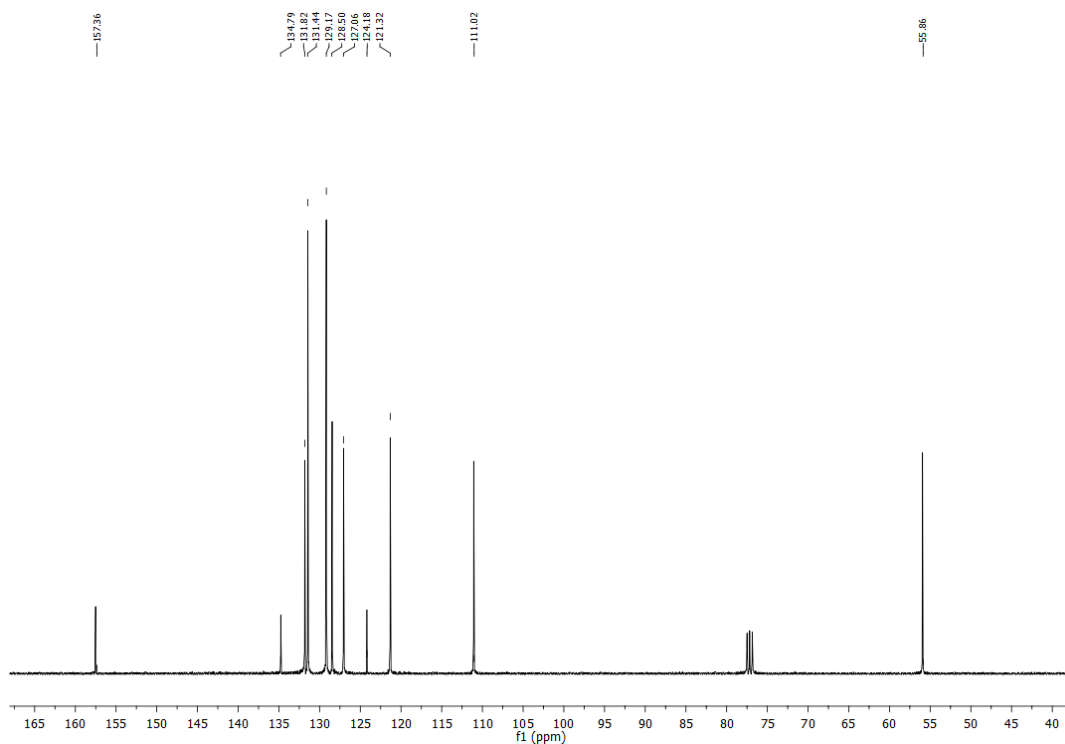

Figure S18. <sup>13</sup>C-NMR spectrum of 9c in CDCl<sub>3</sub>.

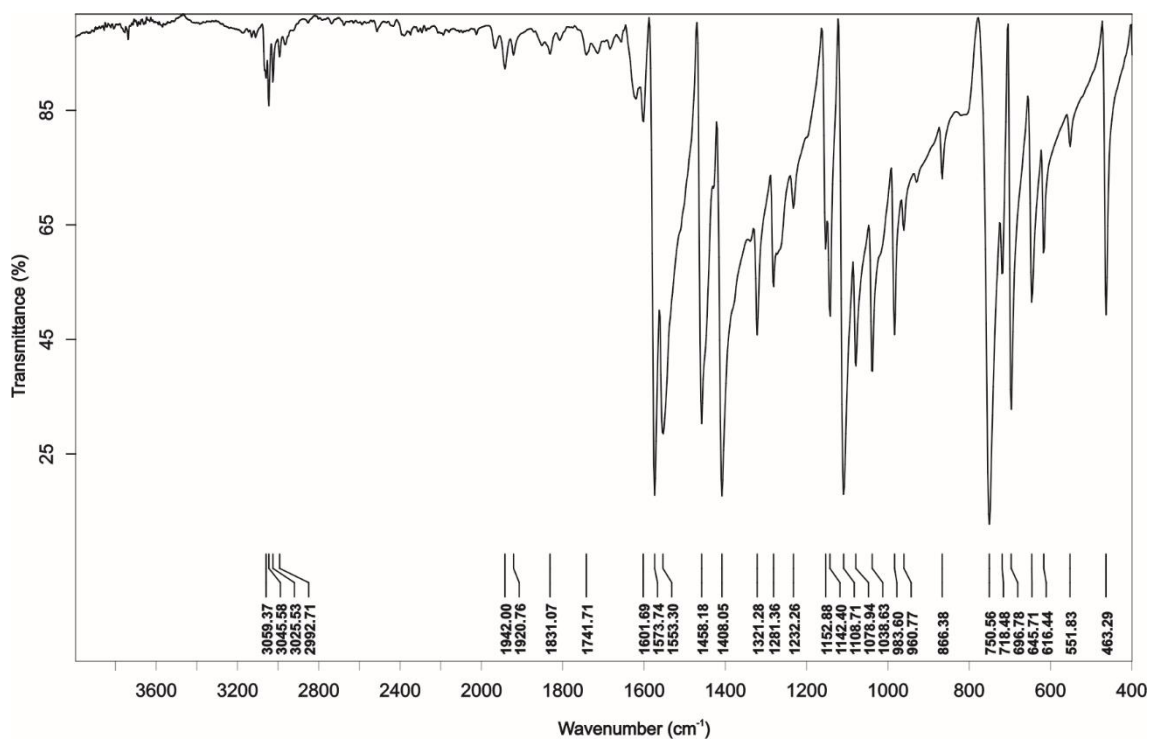

**Figure S19.** FT-IR spectrum of  $[(\text{Py}'\text{Se})_2(\text{CH}_2)]$  (L1).

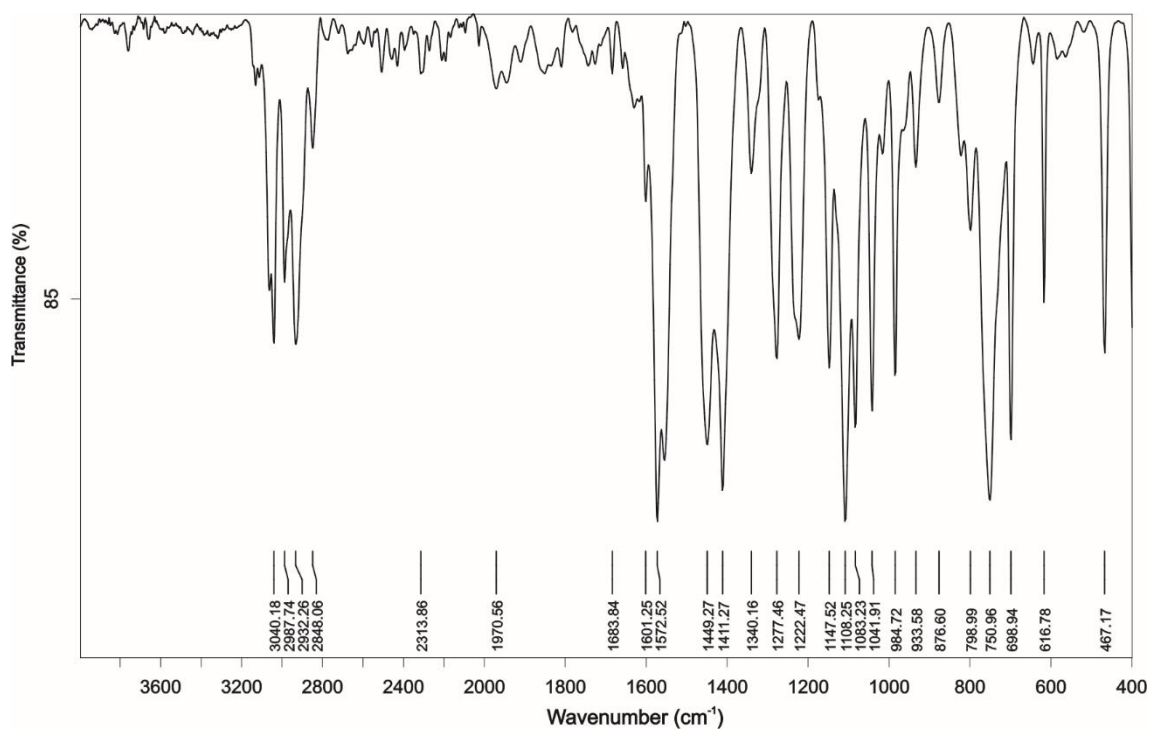

**Figure S20.** FT-IR spectrum of  $[(\text{Py}'\text{Se})_2(\text{C}_3\text{H}_6)]$  (L2).

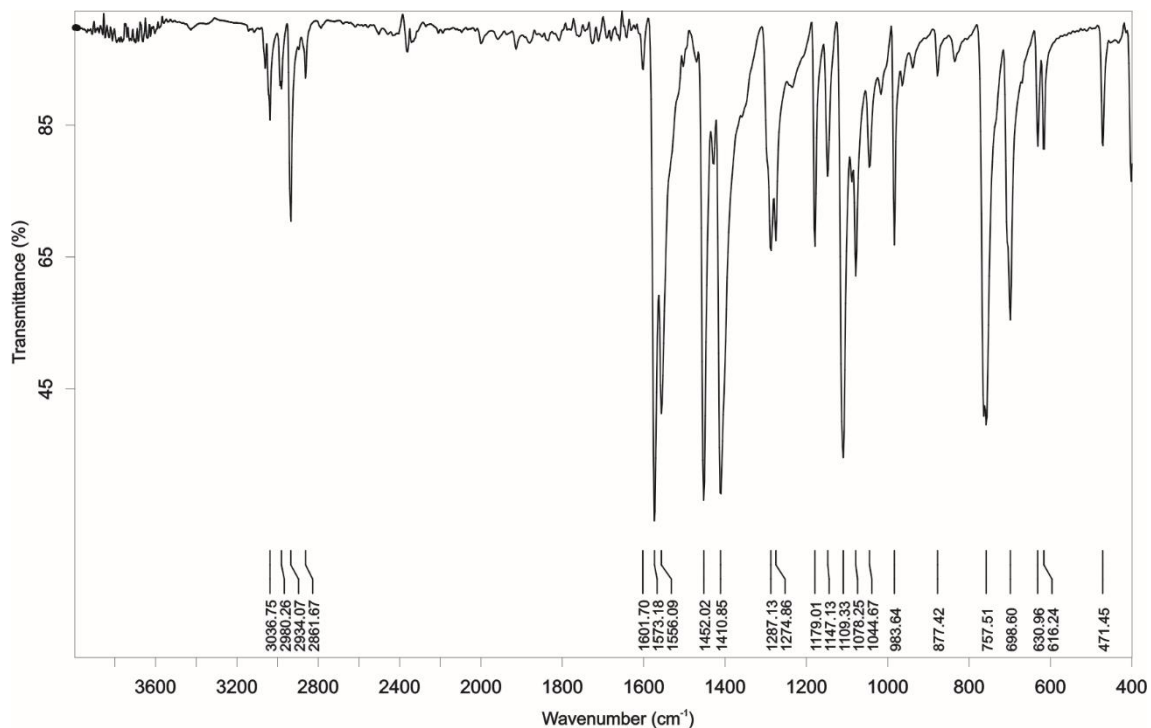

**Figure S21.** FT-IR spectrum of  $[(\text{Py}'\text{Se})_2(\text{C}_4\text{H}_8)]$  (**L3**).

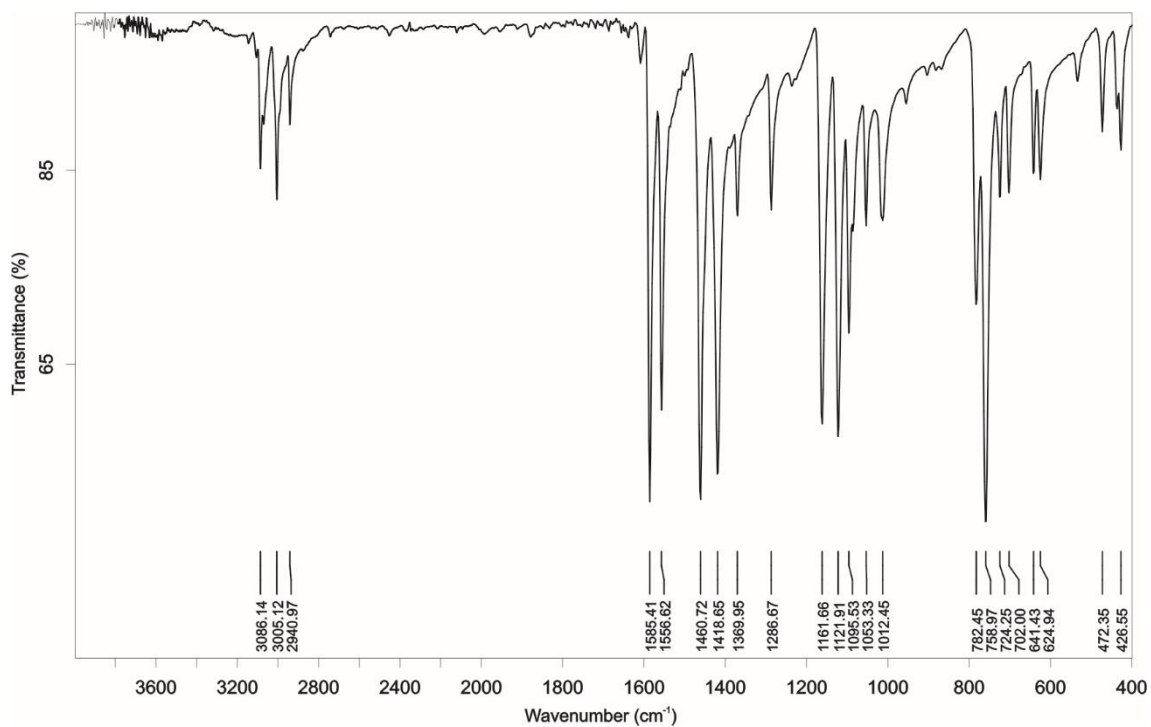

**Figure S22.** FT-IR spectrum of  $[\text{CuCl}_2(\text{L1})]_n$  (**1**).

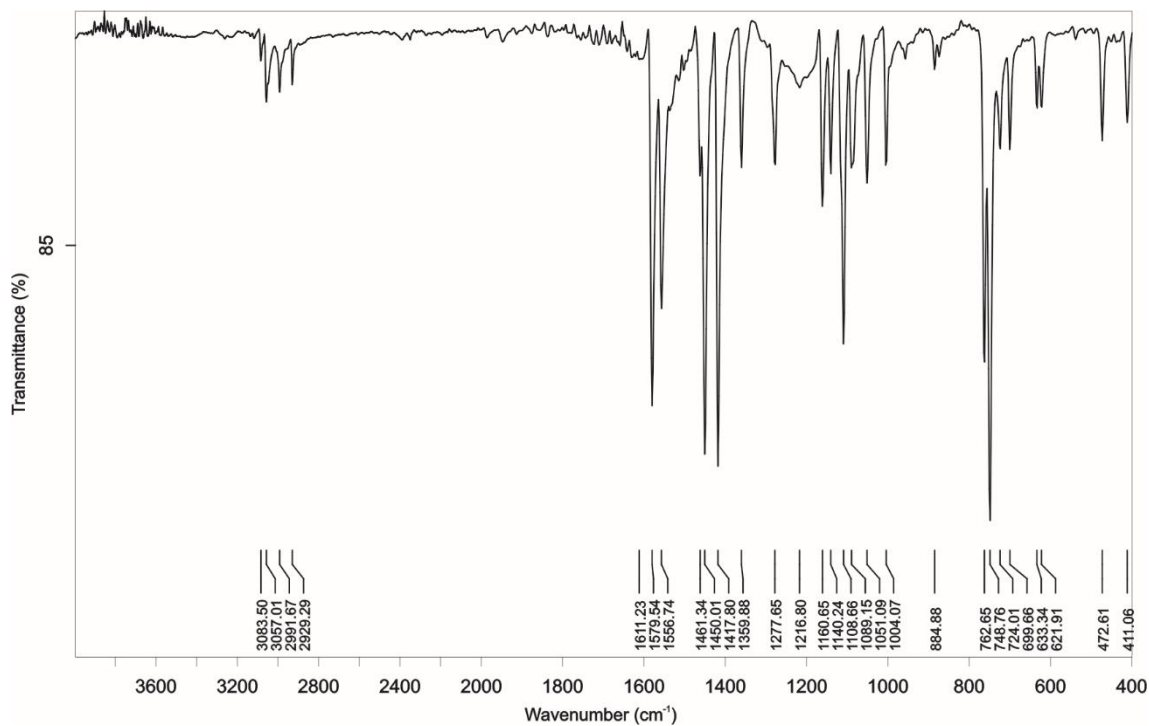

**Figure S23.** FT-IR spectrum of  $[\text{Cu}_4\text{I}_4(\text{L1})_2]$  (2).

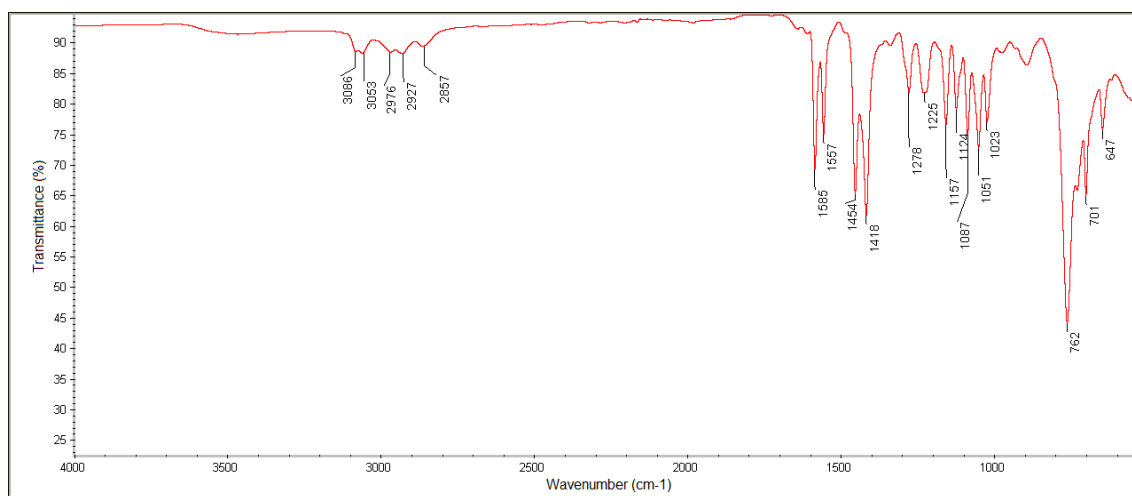

**Figure S24.** FT-IR spectrum of  $[\text{CuCl}_2(\text{L2})_2]$  (3).

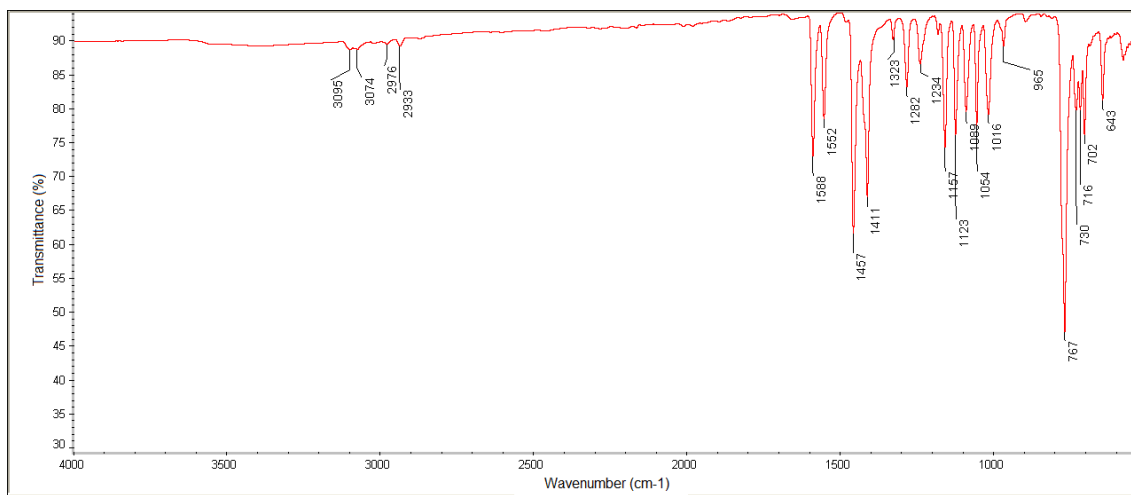

**Figure S25.** FT-IR spectrum of  $[\text{CoCl}_2(\text{L}2)]_n$  (4).

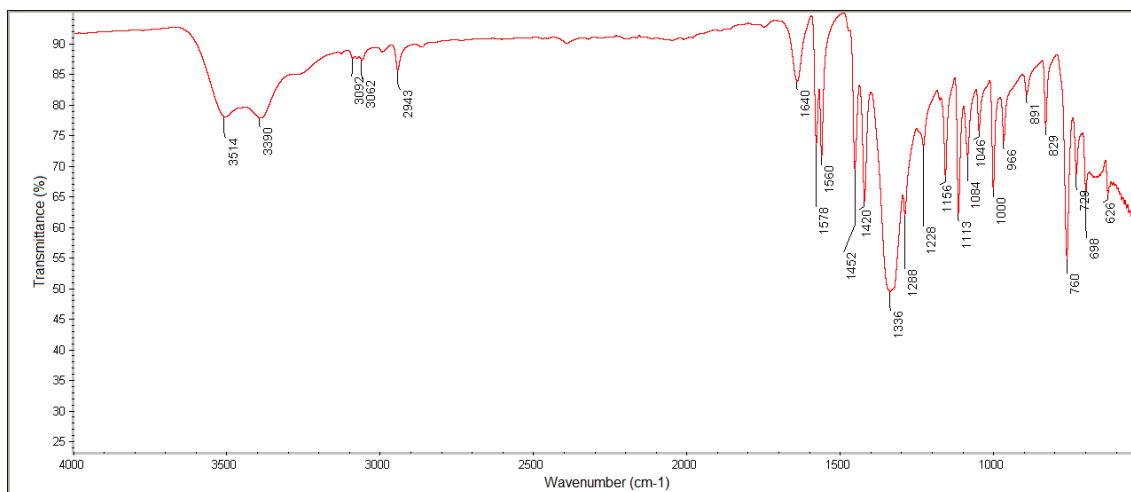

**Figure S26.** FT-IR spectrum of  $[\text{Ag}(\text{L}2)(\text{NO}_3)]_n$  (5).

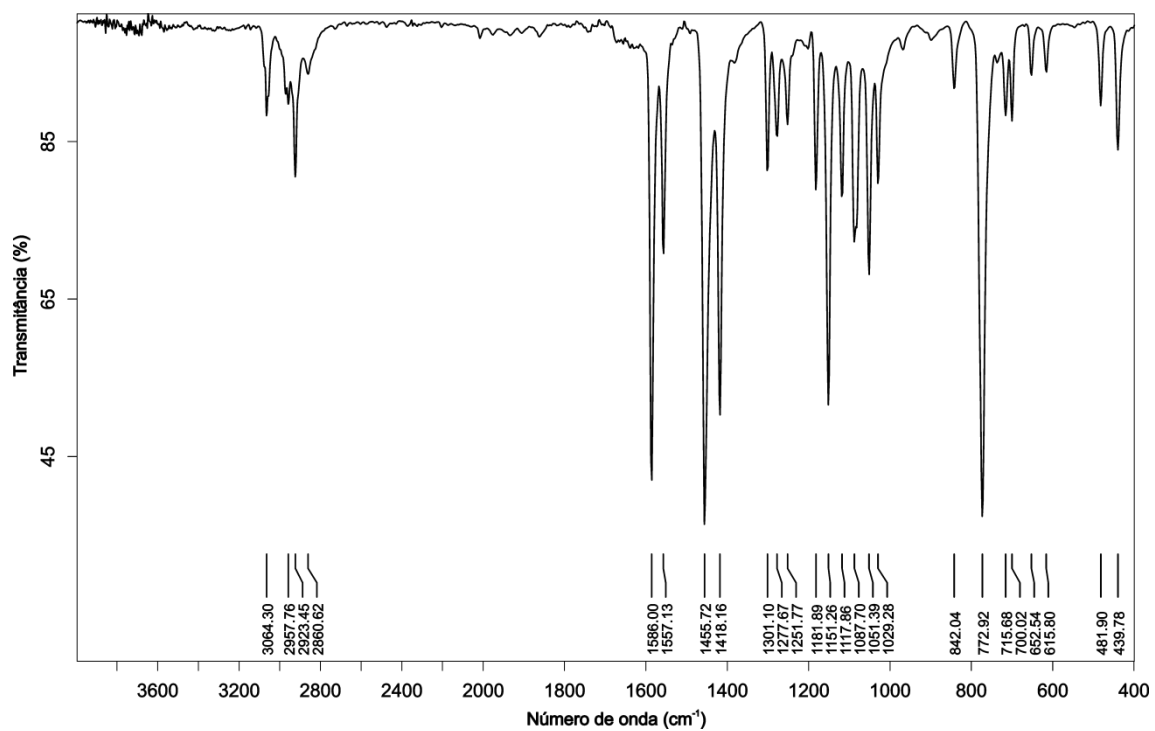

**Figure S27.** FT-IR spectrum of  $[\text{CuCl}_2(\text{L3})]_n$  (6).



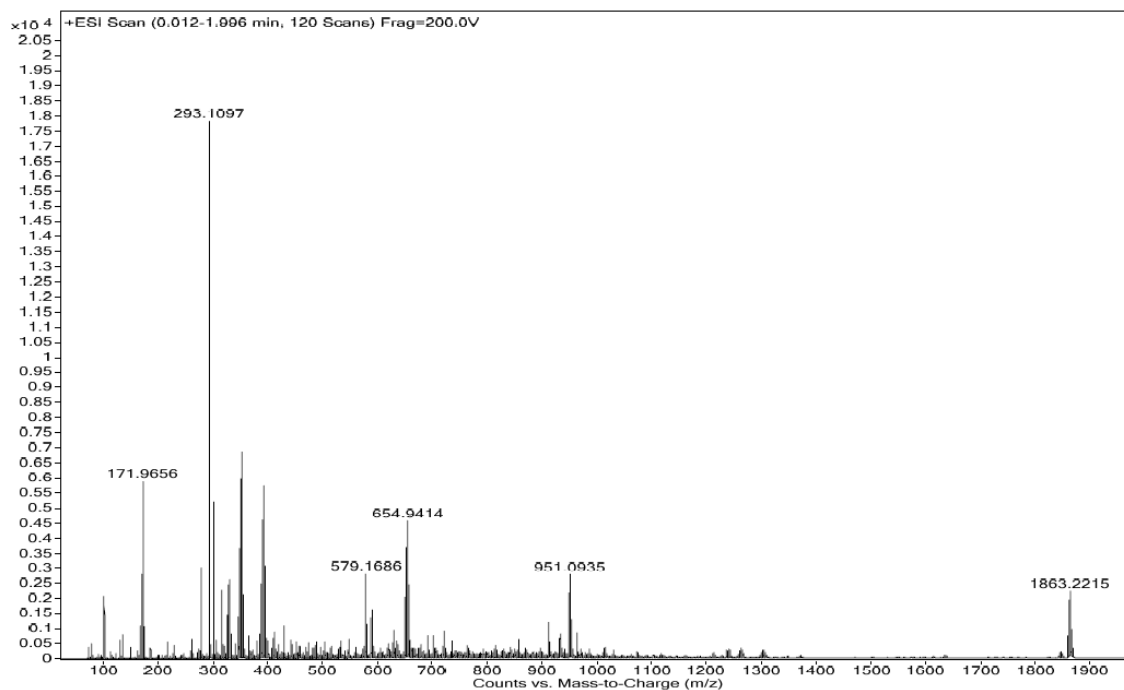

**Figure S28.** ESI+ MS spectrum of  $[\text{CuCl}_2(\text{L1})]_n$  (**1**).

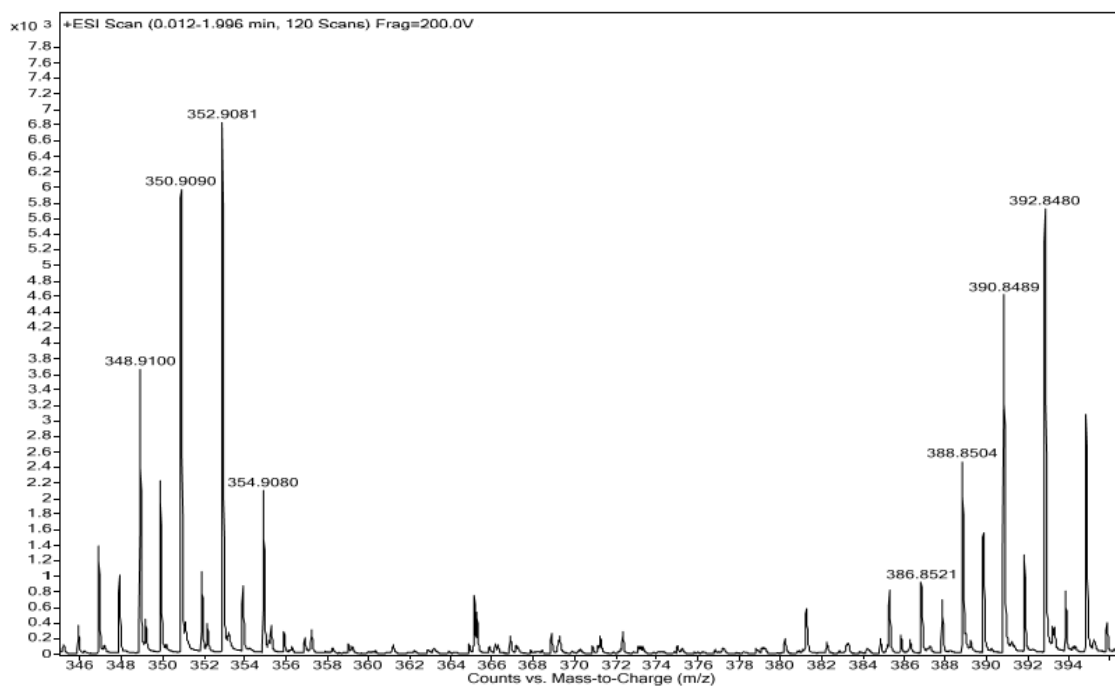

**Figure S29.** Expansion of the mass spectra for the compound  $[\text{CuCl}_2(\text{L1})]_n$  (**1**).

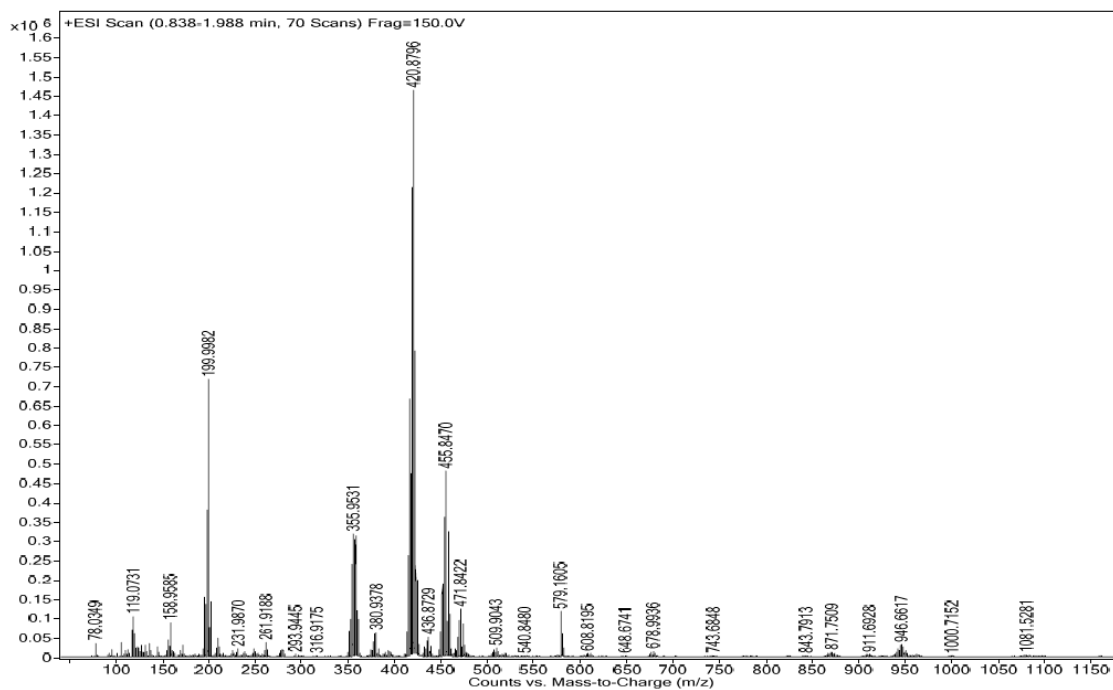

**Figure S30.** ESI+ MS spectrum of  $[\text{CuCl}_2(\text{L}2)_2]$  (**3**).

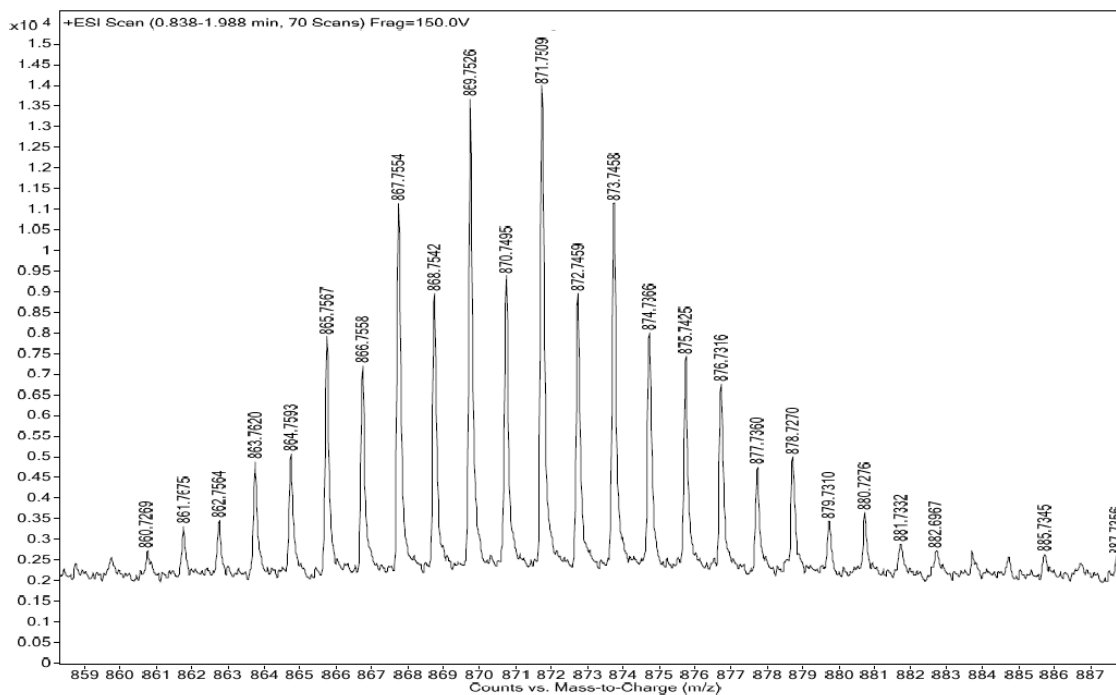

**Figure S31.** Expansion of the mass spectra for the compound  $[\text{CuCl}_2(\text{L}2)_2]$  (**3**).

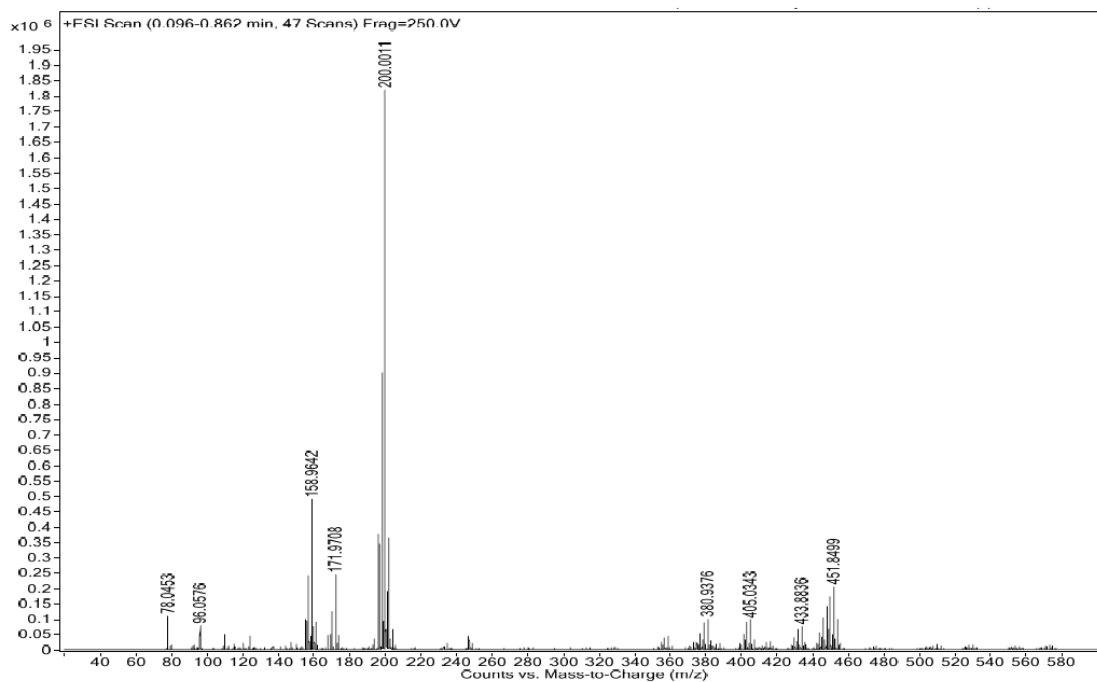

**Figure S32.** ESI+ MS spectrum of  $[\text{CoCl}_2(\text{L}2)]_n$  (**4**).

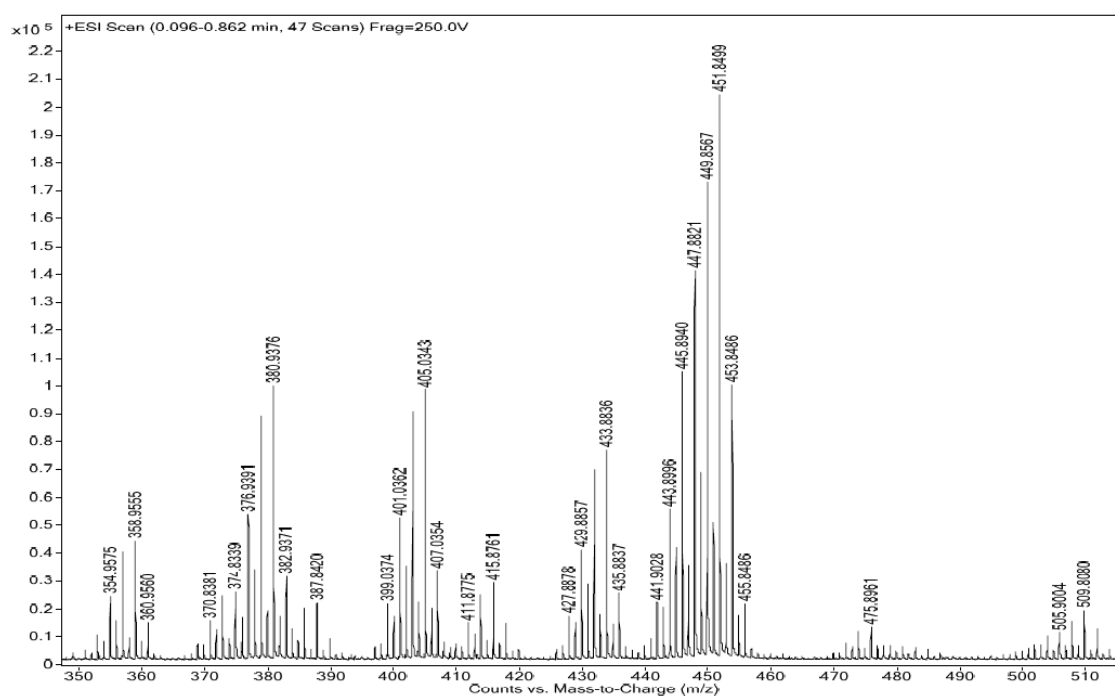

**Figure S33.** Expansion of the mass spectra for the compound  $[\text{CoCl}_2(\text{L}2)]_n$  (**4**).

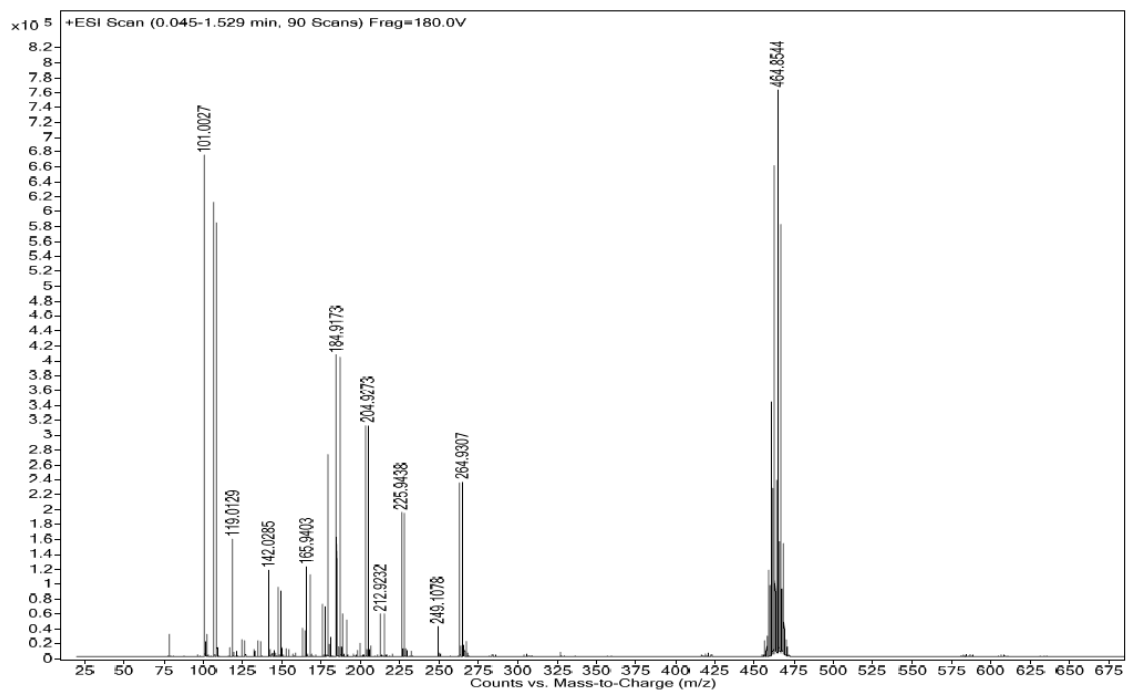

**Figure S34.** ESI+ MS spectrum of  $[\text{Ag}(\text{L}2)(\text{NO}_3)]_n$  (**5**).

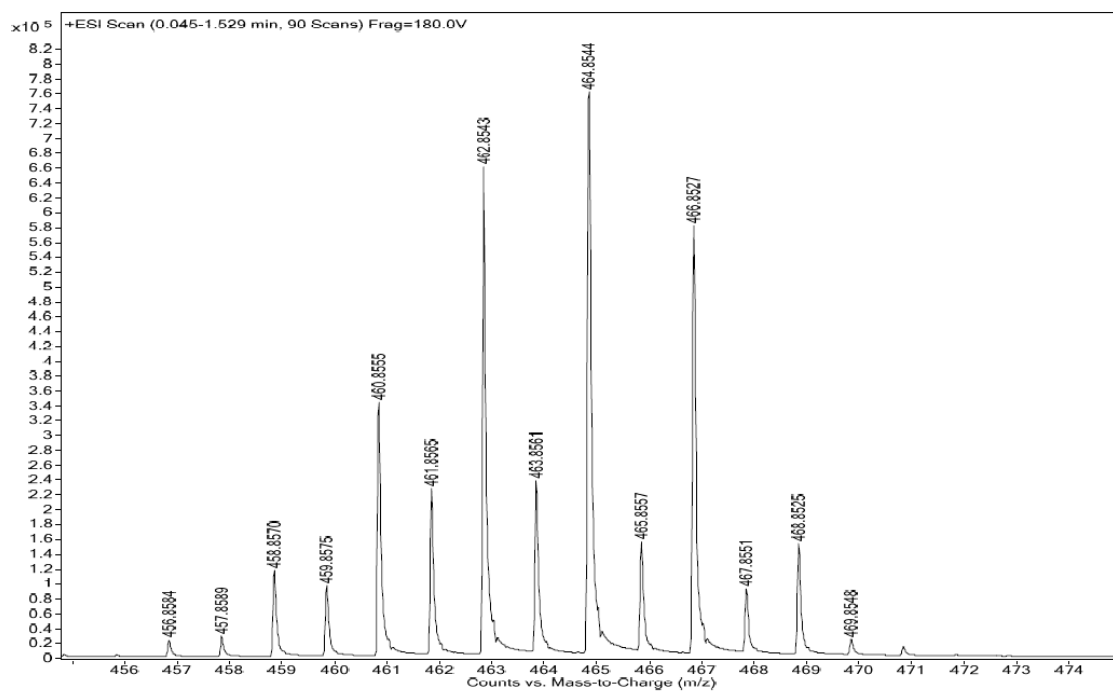

**Figure S35.** Expansion of the mass spectra for the compound  $[\text{Ag}(\text{L}2)(\text{NO}_3)]_n$  (**5**).

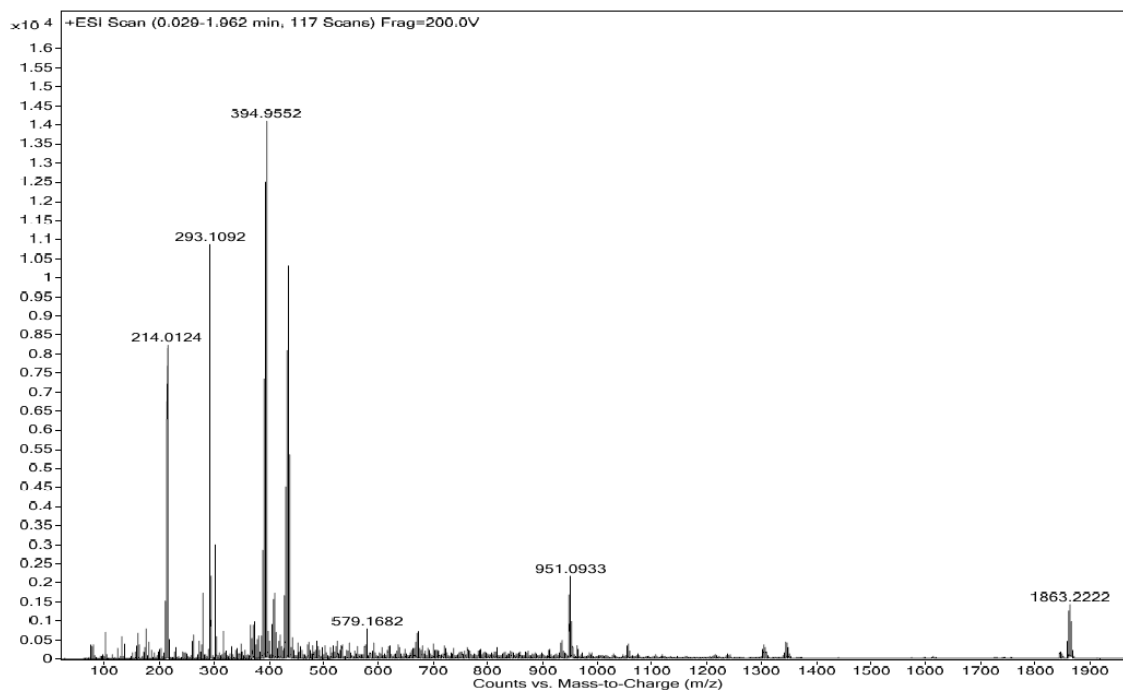

Figure S36. ESI+ MS spectrum of  $[\text{CuCl}_2(\text{L3})]_n$  (6).

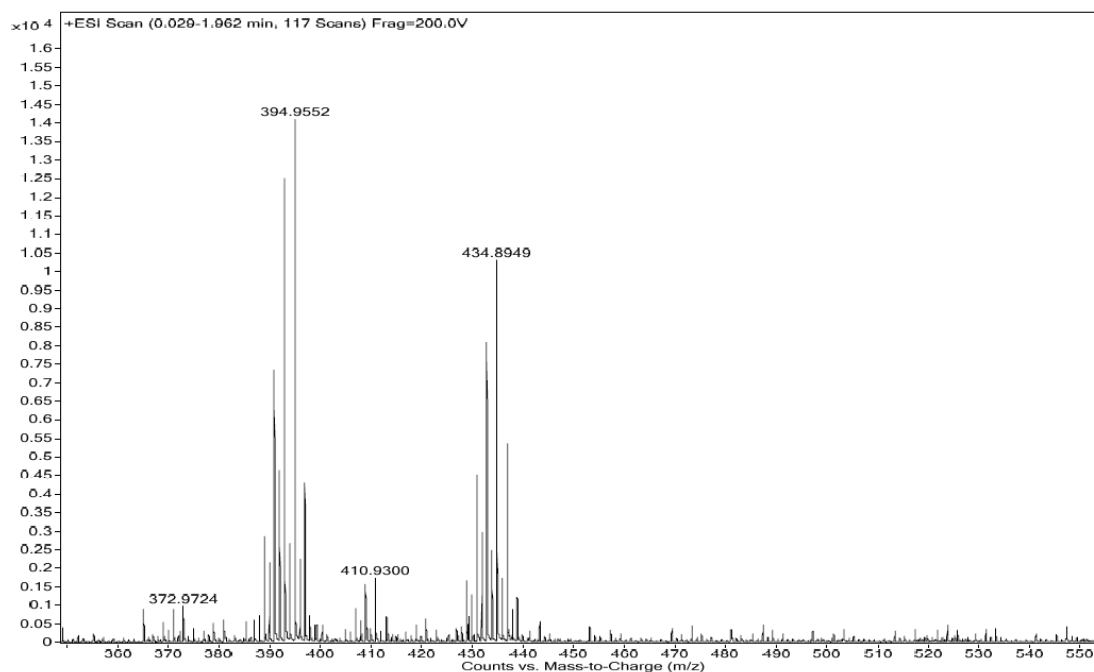

Figure S37. Expansion of the mass spectra for the compound  $[\text{CuCl}_2(\text{L3})]_n$  (6).
